# Supplementary material for: Discrepancies on the association between androgen deprivation therapy for prostate cancer and subsequent dementia: meta-analysis and meta-regression
Source: PubMed Central journal article supplement (PMC5641194; doi:10.18632/oncotarget.20391), 2017-08-22
Supplement: oncotarget-08-73087-s001.pdf [file oncotarget-08-73087-s001.pdf]

# Discrepancies on the association between androgen deprivation therapy for prostate cancer and subsequent dementia: meta-analysis and meta-regression

## SUPPLEMENTARY MATERIALS

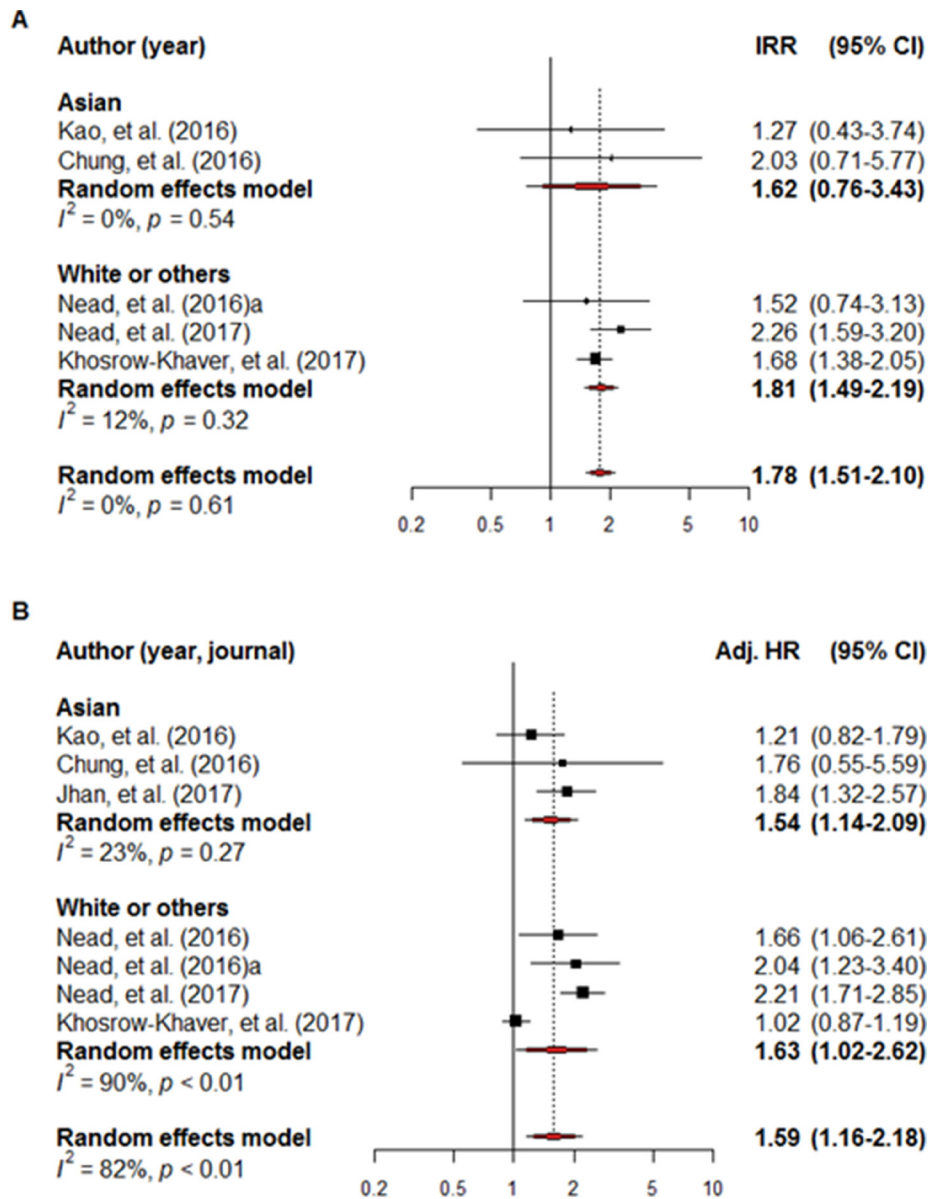

Supplementary Figure 1: A subgroup analysis of the incidence rate ratio and adjusted hazard ratio according to ethnicity.

### Supplementary Table 1: Quality assessment of included studies

| Author (year, journal)           | Selection                                |                                     |                           | Comparability                                                            |                                                                 | Outcome               |                                                 | Risk of bias                     |                                  |
|----------------------------------|------------------------------------------|-------------------------------------|---------------------------|--------------------------------------------------------------------------|-----------------------------------------------------------------|-----------------------|-------------------------------------------------|----------------------------------|----------------------------------|
|                                  | Representativeness of the exposed cohort | Selection of the non-exposed cohort | Ascertainment of exposure | Demonstration that outcome of interest was not present at start of study | Comparability of cohorts on the basis of the design or analysis | Assessment of outcome | Was followup long enough for outcomes to occur? | Adequacy of follow up of cohorts | No. of stars (high/moderate/low) |
| Kao, et al. (2016)               | *                                        | *                                   | *                         | *                                                                        | *                                                               | *                     | *                                               | *                                | 8 (low)                          |
| Chung, et al. (2016)             | *                                        | *                                   | *                         | *                                                                        | *                                                               | *                     | *                                               | *                                | 8 (low)                          |
| Nead, et al. (2016)              |                                          | *                                   | *                         | *                                                                        | **                                                              | *                     | *                                               | *                                | 8 (low)                          |
| Nead, et al. (2016) <sup>a</sup> |                                          | *                                   | *                         | *                                                                        | **                                                              | *                     | *                                               | *                                | 8 (low)                          |
| Nead, et al. (2017)              |                                          | *                                   | *                         | *                                                                        | **                                                              | *                     | *                                               | *                                | 8 (low)                          |
| Khosrow-Khaver, et al. (2017)    | *                                        | *                                   | *                         | *                                                                        | **                                                              | *                     | *                                               | *                                | 9 (low)                          |
| Jhan, et al. (2017)              | *                                        | *                                   | *                         | *                                                                        | **                                                              | *                     | *                                               | *                                | 9 (low)                          |

Each asterisk represents one star in the Newcastle-Ottawa Scale system. The maximum number of stars is 2 for comparability and 1 for each of the other categories, for a total of up to 9 stars.

a, published on Scientific Reports.
